# Supplementary material
Source: MDPI journal article supplement (https://www.mdpi.com/2673-6497/5/1/8)
Supplement: s1 [file s1]

Archive with 1 entries (1 files):
- solids-2834636-supplementary.pdf
